# Supplementary material for: Single-cell profiling reveals transcriptome dynamics during bovine oocyte growth
Source: PubMed Central journal article supplement (PMC10998374; doi:10.1186/s12864-024-10234-0), 2024-04-06

**RNA\_plate2\_1.1**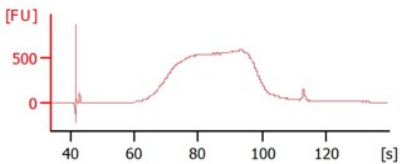**RNA\_plate2\_1.1**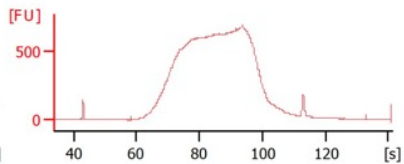**RNA\_plate2\_1.1**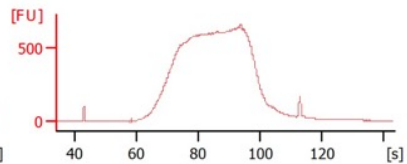**RNA\_plate2\_1.2**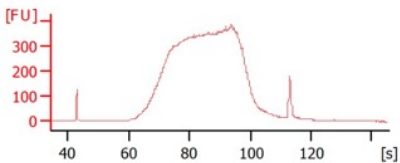**RNA\_plate2\_1.2**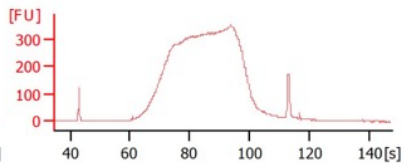**RNA\_plate2\_1.5**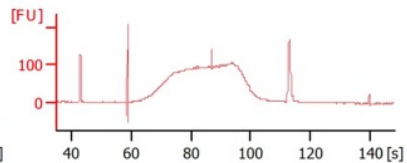**RNA\_plate2\_1.5**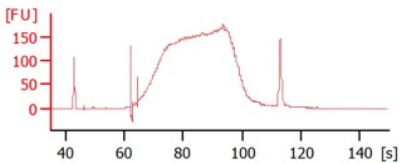**RNA\_plate2\_1.5**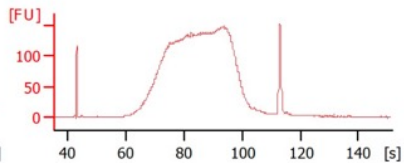**RNA\_plate2\_1.10**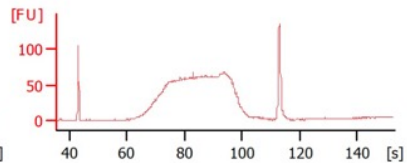**RNA\_plate2\_1.10**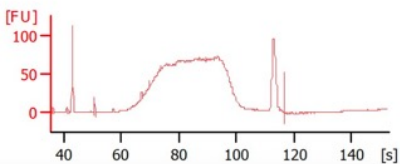**RNA\_plate2\_1.10**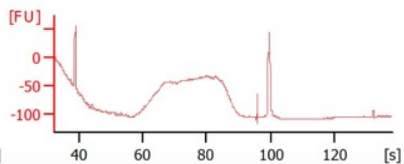

Supplement: 12864_2024_10234_MOESM1_ESM.pdf [file 12864_2024_10234_MOESM1_ESM.pdf]
